# Supplementary material for: Influence of plasma macronutrient levels on hepatic metabolism: role of regulatory networks in homeostasis and disease states
Source: Royal Society of Chemistry journal article supplement (doi:10.1039/c5ra18128c), 2016-01-01
Supplement: c5ra18128c3.xlsx [file c5ra18128c3.xlsx]

## Sheet: Sheet2
						Low Glucose									Normal Glucose									High Glucose
Metabolism	Liver_Fluxes	GL_AL_FL	GL_AL_F	GL_AL_FH	GL_A_FL	GL_A_F	GL_A_FH	GL_AH_FL	GL_AH_F	GL_AH_FH	G_AL_FL	G_AL_F	G_AL_FH	G_A_FL	G_A_F	G_A_FH	G_AH_FL	G_AH_F	G_AH_FH	GH_AL_FL	GH_AL_F	GH_AL_FH	GH_A_FL	GH_A_F	GH_A_FH	GH_AH_FL	GH_AH_F	GH_AH_FH
	F_Glu_G6p_L	0.0564766	0.0726013	0.114477	0.0929623	0.101546	0.108876	0.205799	0.211466	0.100803	1.03047	1.04613	0.438979	1.01091	1	0.42201	0.91336	0.939438	0.347599	2.19137	2.15849	6.50593	5.11723	5.09222	6.37871	8.7457	8.93765	2.98445
	F_G6p_F6p_L	0.0241463	0.0329051	0.0697605	0.0597997	0.0690114	0.0767651	0.61216	0.731527	0.0905967	0.990725	0.994059	0.0878472	1.15774	1	0.0985245	1.2712	1.50312	0.0847016	8.93583	7.77319	8.16824	9.56335	8.60043	7.49844	1.64184	1.40624	0.143527
	F_F6p_F16bp_L	0.208831	0.268931	0.479227	0.465892	0.522531	0.543049	2.77863	2.92866	0.659927	0.94931	0.864325	0.347718	1.09123	1	0.41622	2.9577	3.10291	0.55636	5.29711	4.05768	6.77692	7.59396	6.12126	5.49653	0.396782	0.287807	0.430083
Glycolysis	F_F16bp_Gap_L	0.0713734	0.0985701	0.230387	0.181633	0.215125	0.265144	2.03784	2.31023	0.326733	0.857446	0.874743	0.231212	0.890739	1	0.283189	2.25872	2.40851	0.289416	3.47329	2.48722	6.84846	7.08848	4.81104	4.61206	0.35474	0.293043	0.280252
	F_Gap_PEP_L	0.263315	0.339919	0.731446	0.535421	0.590469	0.678753	2.5406	2.34733	0.563496	1.03031	0.910257	0.625076	1.1921	1	0.676122	1.80659	1.67221	0.456605	0.312125	0.224907	0.502237	0.474073	0.376122	0.477707	0.0566612	0.0489422	0.195172
	F_PEP_Pyr_L	2.83829e-06	8.333e-06	0.00115635	7.36776e-05	0.000188883	0.00102892	0.400861	0.50706	0.000949959	1.02998	1.12739	0.00245076	0.92427	1	0.00254875	0.405838	0.502539	0.000338225	0.195905	0.144821	0.421842	0.338523	0.278204	0.38284	0.0971323	0.0851955	0.000206291
Glycogen Met	F_G6p_Gly_L	2.27316e-05	4.73392e-05	9.21774e-05	0.000193656	0.000232013	0.00010085	0.00816128	0.0115179	0.000112039	0.745872	0.889096	0.000565212	1.57734	1	0.000660418	0.100384	0.203911	0.000188336	0.359965	0.334631	3.85154	1.45228	1.35538	3.30452	2.62762	2.52438	0.000723068
	F_Gly_G6p_L	0.0793799	0.0791975	0.0821701	0.0769876	0.0766765	0.0798771	0.562638	0.699184	0.0759441	0.960469	0.914429	0.357094	1.03701	1	0.354619	1.57082	1.52657	0.13298	0.0810279	0.0750488	0.208298	0.130494	0.124501	0.195656	0.187343	0.182476	1.17167
pentose pathway	F_G6p_R5p_L	0.0178603	0.0173952	0.00247405	0.0227847	0.0212689	0.00237796	0.0462378	0.0315346	0.00710563	1.22909	0.531813	0.00300388	1.9938	1	0.00350763	0.132272	0.0896912	0.00586749	0.0405295	0.0358965	0.41932	0.135719	0.149492	0.942466	1.20727	1.04658	0.0117317
	F_R5p_F6p_Gap_L	0.0178599	0.0173948	0.00247385	0.0227842	0.0212684	0.00237803	0.0462434	0.0315373	0.00711406	1.22905	0.531808	0.00300416	1.99377	1	0.00350801	0.132293	0.0897024	0.00586751	0.0405288	0.0358958	0.419346	0.135716	0.149489	0.942473	1.20722	1.04653	0.0117347
	F_F6p_Glsmn_L	0.151566	0.280062	0.647724	0.298973	0.568116	1.13983	0.942508	1.83517	2.36393	0.321396	0.598101	0.917304	0.523752	1	1.80687	1.41726	2.71351	3.33058	1.40449	2.04309	6.74134	3.26672	4.79432	8.81336	1.1344	1.61353	6.56917
Hexose pathway	F_Glsmn_GlNAc_L	0.0218841	0.0202828	0.0386883	0.0289536	0.0272434	0.045409	0.103353	0.0956334	0.0629136	0.754134	0.547436	0.0341583	0.93048	1	0.0437098	0.258848	0.248626	0.0740344	0.00186001	0.0016308	0.22278	0.024403	0.0267711	0.412799	0.155274	0.154856	0.111572
	F_G6p_Glu_L	0.934305	0.940029	0.879479	1.03659	1.03567	0.957078	0.903949	0.899414	1.07829	0.981921	0.953795	1.26099	0.866204	1	1.37856	1.30892	1.21435	1.2384	0.323497	0.322002	0.888847	0.731836	0.731901	0.859027	1.26352	1.29332	2.59693
	F_F6p_G6p_L	1.56366	1.56554	1.4494	1.75008	1.75018	1.60321	1.31538	1.25662	1.84876	0.927511	0.908847	1.70887	0.842267	1	1.95831	1.28337	1.20059	1.92771	0.706582	0.622269	0.720594	0.894188	0.803439	0.57708	0.336434	0.285232	2.07192
	F_F16bp_F6p_L	1.54972	1.6128	1.63789	1.93346	1.96895	1.81977	1.98794	1.90822	2.11008	0.947735	0.908142	1.76019	0.84613	1	2.02884	1.811	1.62718	2.11488	0.649383	0.500022	0.957487	1.13239	0.898101	0.64888	0.149969	0.123832	2.08261
	F_Gap_F16bp_L	1.31856	1.34988	1.35893	1.57265	1.59958	1.51194	1.77816	1.76789	1.75483	0.926786	0.926875	1.56615	0.793879	1	1.81064	1.65153	1.49546	1.79349	0.505477	0.362653	1.20904	1.29471	0.849499	0.65996	0.15097	0.131174	1.85218
Gluconeogenesis	F_PEP_Gap_L	1.47924	1.58721	1.83213	1.95372	1.99869	1.90692	2.03522	1.83541	1.98666	0.992151	0.934665	1.92144	0.897141	1	2.17491	1.51788	1.30634	1.95806	0.00114622	0.00105999	0.0107947	0.00499544	0.00482106	0.010054	0.0566887	0.0581421	1.76432
	F_OAA_PEP_L	1.15876	1.16022	1.05567	1.31006	1.3096	1.18348	0.990529	0.953128	1.38864	1.00646	1.05637	1.22963	0.775319	1	1.43268	0.957085	0.909654	1.44708	0.00776187	0.00689166	0.0620705	0.0326868	0.0296345	0.0447824	0.0884582	0.0833926	1.53394
	F_Pyr_OAA_L	0.990451	1.01445	1.00998	0.974656	1.00383	1.042	0.649787	0.650318	1.08641	1.08076	1.11361	1.15344	0.764957	1	1.25069	0.676988	0.664424	1.15762	0.00490835	0.00438252	0.0831255	0.031444	0.0278022	0.0530149	0.0384978	0.0363969	1.2714
	F_Mal_Shtl_L	0.890497	0.895992	0.828001	1.02864	1.03653	0.939673	0.988461	0.982037	1.09967	0.95982	1.01642	0.947294	0.759524	1	1.112	0.985611	0.962145	1.1261	0.0103618	0.0100839	0.0797986	0.0481445	0.0459025	0.0700833	0.15744	0.157955	1.17246
	F_Mal_OAA_Lc	0.726241	0.736924	0.692966	0.869491	0.8856	0.815637	1.02744	1.0841	1.00821	0.91468	1.02578	0.733254	0.742555	1	0.870851	1.08339	1.13215	1.01329	0.119473	0.112178	0.410511	0.311476	0.293995	0.349735	0.442672	0.437879	1.0061
	F_OAA_Mal_Lc	0.23589	0.261345	0.284524	0.391247	0.430323	0.435591	0.963696	1.15894	0.716441	0.802128	0.975377	0.095727	0.755497	1	0.151374	1.16029	1.37834	0.662721	0.435263	0.407628	1.38742	1.07673	1.01521	1.18837	1.11918	1.09803	0.50132
	F_Pyr_trans	0.970382	0.984521	0.976359	0.957436	0.97587	1.00673	0.677209	0.658036	1.04946	1.10565	1.1005	1.10661	0.861788	1	1.19993	0.696347	0.669894	1.11495	0.0388131	0.0364903	0.159469	0.131563	0.118287	0.143529	0.203519	0.185774	1.22116
	F_Pyr_Acoa_L	0.495283	0.297325	0.210841	0.548115	0.332955	0.204149	1.26186	0.81343	0.208878	1.6572	0.801607	0.049021	3.0556	1	0.0538336	1.10997	0.781831	0.147821	0.816525	0.773048	1.97001	2.46189	2.22411	2.29314	3.96993	3.59338	0.0857669
	F_OAA_Acoa_Cit_Lm	1.13137	1.1357	1.12843	1.10072	1.10587	1.10028	1.05527	1.06127	1.04941	0.986342	0.978804	1.00067	0.933979	1	1.0135	1.06498	1.06684	1.05141	0.0373759	0.0358212	0.232949	0.136666	0.130278	0.202766	0.224765	0.220426	1.0269
	F_Cit_AKG_L	1.19587	1.2005	1.19408	1.16322	1.16882	1.16429	1.11883	1.12609	1.11248	0.983465	1.01018	1.05517	0.904925	1	1.06879	1.11667	1.12089	1.10392	0.0403698	0.038739	0.238404	0.145968	0.139333	0.193349	0.208435	0.205197	1.0741
TCA Cycle	F_AKG_Scoa_L	1.17955	1.18094	1.17962	1.22255	1.22194	1.22132	1.24096	1.23649	1.26369	0.947555	0.968044	1.03873	0.917974	1	1.10949	1.22057	1.21328	1.24957	0.0464124	0.0450131	0.255809	0.170408	0.164683	0.243509	0.354859	0.354853	1.23378
	F_Scoa_Suc_L	0.521943	0.512518	0.507029	0.546921	0.536341	0.52988	0.871128	0.916455	0.565826	0.944855	0.936522	0.440412	0.875341	1	0.472069	1.14464	1.22453	0.555193	0.0191086	0.0184819	0.138441	0.0759664	0.0726608	0.125037	0.175257	0.174657	0.535858
	F_Suc_Mal_L	1.01033	1.01178	1.01821	1.04856	1.04921	1.05442	1.24489	1.24958	1.09316	0.950364	0.96848	0.895007	0.913574	1	0.956513	1.23474	1.23104	1.07573	0.0397125	0.0385122	0.219172	0.145768	0.140857	0.208006	0.348334	0.348699	1.06023
	F_Mal_OAA_Lm	0.343729	0.332789	0.318	0.350336	0.33711	0.299262	0.563683	0.561452	0.243202	1.07325	1.0285	0.47564	1.01341	1	0.526803	0.565413	0.566056	0.258394	0.0388433	0.0376313	0.178859	0.12538	0.122249	0.181444	0.230211	0.227858	0.359105
	F_Suc_Scoa_L	0.0925848	0.0700561	0.050654	0.10757	0.0832766	0.063084	0.531421	0.609846	0.101584	0.937164	0.907154	0.0329537	0.844821	1	0.0382752	1.05151	1.21077	0.0968817	0.000505807	0.000380763	0.0764397	0.0148279	0.0126549	0.0581229	0.018726	0.0172016	0.0705229
	F_OAA_Mal_Lm	0.152708	0.166305	0.163082	0.179028	0.192318	0.206114	0.100809	0.0954193	0.249798	1.17768	1.17965	0.559025	0.810901	1	0.684433	0.135252	0.122549	0.338689	9.97787e-05	9.89864e-05	0.00480125	0.000883314	0.000837271	0.00515317	0.010345	0.0105907	0.560166
	F_Pyr_Lac_L	0.174884	0.1929	0.21436	0.23141	0.261608	0.295613	0.481253	0.581417	0.436633	0.932883	0.964275	0.0930971	1.0878	1	0.132344	0.626826	0.727502	0.416575	1.13845	1.13204	1.36827	1.36075	1.32709	1.22834	1.0913	1.1077	0.331522
Lactate dehydrogenase	F_Mal_Pyr_L	0.0108803	0.0105823	0.0011328	0.0144178	0.013735	0.00143076	0.0430427	0.0384016	0.00699354	0.92623	0.567394	0.000775614	1.07009	1	0.00103642	0.122976	0.115044	0.00493888	0.00140775	0.0011709	0.135287	0.0223922	0.0221081	0.184298	0.100479	0.0853625	0.00329297
	F_Lac_Pyr_L	2.10591	2.07471	1.96072	1.96901	1.91417	1.81887	1.08282	0.92812	1.54154	1.14379	1.01509	2.15776	1.1328	1	2.11468	0.863432	0.733993	1.59539	0.880115	0.876301	0.47608	0.654425	0.663136	0.47044	0.841822	0.842557	1.81664
	F_Cit_Shtl	0.0130054	0.0125604	0.000762468	0.0168532	0.0158662	0.00095179	0.041066	0.0338902	0.00508954	1.01943	0.556156	0.00116517	1.34212	1	0.00140891	0.122167	0.104439	0.00346662	0.00615428	0.00523788	0.218918	0.0446964	0.0399448	0.381383	0.470127	0.449499	0.00233952
	F_Cit_OAA_Acoa_Lc	0.0129427	0.012558	0.00156301	0.016823	0.0158682	0.0016623	0.0412337	0.0339021	0.00683377	1.01815	0.555464	0.00160266	1.34169	1	0.00190874	0.122095	0.103863	0.00523741	0.014742	0.0125218	0.227546	0.0590337	0.0636541	0.439456	0.430279	0.373638	0.00625535
Fatty synthesis	F_Acoa_Malcoa_L	0.0130788	0.012692	0.00149949	0.016997	0.0160321	0.00158608	0.041177	0.0338031	0.00679105	1.01832	0.556239	0.00152217	1.34055	1	0.00180406	0.12151	0.103076	0.00509448	0.00562628	0.00479381	0.202435	0.047576	0.0506038	0.368741	0.414661	0.356511	0.00577253
	F_Malcoa_FFA_L	0.0130736	0.012688	0.00149811	0.0169951	0.0160306	0.00158549	0.0411904	0.0338046	0.00680615	1.01823	0.556227	0.00151273	1.3405	1	0.00179194	0.121511	0.103064	0.00510933	0.00562593	0.00479336	0.202451	0.0475735	0.0505995	0.368726	0.414649	0.356492	0.00576162
	F_Carn_Shtl	1.12837	1.14213	1.13961	1.09476	1.11031	1.11131	1.03758	1.06615	1.09203	0.954528	0.988135	1.01349	0.832916	1	1.03642	1.04952	1.06949	1.11122	0.00206988	0.00221677	0.153099	0.0263975	0.0309681	0.104401	0.0460575	0.0595091	1.10293
Beta Oxidation	F_FFA_Palcoa_L	1.12838	1.14213	1.13961	1.09476	1.11031	1.11131	1.03751	1.06607	1.09204	0.954539	0.988134	1.01349	0.832921	1	1.03642	1.04948	1.0694	1.11122	0.00206971	0.00221657	0.153077	0.0263995	0.030972	0.104437	0.0460605	0.0595132	1.10293
	F_Palcoa_Acoa_L	1.12835	1.14218	1.13968	1.09478	1.11037	1.11137	1.03446	1.06317	1.09216	0.954689	0.98812	1.01356	0.833001	1	1.03649	1.04715	1.06532	1.11131	0.000329209	0.000791541	0.151408	0.0267767	0.0313421	0.104279	0.0460608	0.0595129	1.10296
	F_Glr_Grp_L	0.959741	0.965996	1.08849	0.879647	0.873659	1.05839	0.634482	0.62708	0.989094	0.979618	0.993866	1.45369	0.963365	1	1.43742	0.703736	0.716625	1.08188	0.0850771	0.0829567	0.241202	0.126965	0.126869	0.253184	0.138656	0.141427	1.239
	F_Grp_Gap_L	1.26124	1.25626	1.30063	1.15201	1.12944	1.2429	0.77245	0.702681	1.12233	1.12324	1.02089	1.71104	1.06648	1	1.67986	0.809133	0.711821	1.22373	0.101638	0.0977468	0.206212	0.145922	0.141603	0.2076	0.167716	0.167185	1.4153
Triglyceride met	F_TG_FFA_Glr_L	1.95236	2.03959	2.69629	1.88281	1.97932	2.81143	1.0753	1.14182	2.95386	0.817327	0.948487	3.2007	0.766416	1	3.24515	0.998999	1.11826	3.18993	0.053321	0.0533762	0.342305	0.143715	0.146001	0.367033	0.346934	0.361841	3.34562
	F_FFA_Grp_TG_L	0.0547747	0.0952688	0.445086	0.0579218	0.103651	0.503434	0.201855	0.394634	0.599834	0.51212	0.915972	0.681898	0.597532	1	0.712458	0.367137	0.736458	0.670679	0.0117207	0.016109	0.308462	0.0354471	0.0494984	0.339919	0.0255823	0.0388314	0.720583
	F_Acoa_HMGCoa_L	5.23158e-05	5.58317e-05	0.000591939	0.000153472	0.000181334	0.000614435	0.0413115	0.0357477	0.000880884	1.05046	0.487027	0.000371626	1.54315	1	0.000425243	0.14803	0.144434	0.000545149	0.82563	0.699387	2.50292	1.08069	1.2273	7.21738	1.8176	1.88446	0.000581166
	F_HMGCoa_Mevl_L	0.0011642	0.00131899	0.00576987	0.00224119	0.00271563	0.00487891	0.0458592	0.0374589	0.00361712	1.00648	0.484147	0.00244791	1.50311	1	0.00159844	0.160029	0.152911	0.00112576	0.816025	0.690739	2.52099	1.06911	1.21429	7.12241	1.76742	1.83441	0.00419723
Cholesterol Synthesis	F_Mevl_Squl_L	0.00190389	0.0024785	0.0177552	0.00425739	0.00631158	0.0175351	0.371479	0.345088	0.0194713	0.804549	0.597403	0.021327	1.0065	1	0.0222127	0.594512	0.634082	0.0116745	0.417311	0.391972	0.848372	0.487646	0.507429	1.15422	0.29595	0.320778	0.0106834
	F_Squl_Chol_L	0.00269824	0.00351468	0.0240244	0.00652818	0.00968755	0.0247055	0.441009	0.449913	0.0303036	0.744008	0.846207	0.0194988	0.790239	1	0.0210857	0.643139	0.74662	0.0166997	0.315657	0.296609	0.727422	0.360263	0.372185	0.817755	0.231197	0.239315	0.0119885
	F_Chol_Bile_L	0.00230132	0.00300038	0.0205917	0.00560344	0.0083302	0.0212759	0.578897	0.699473	0.0264806	0.703459	0.98636	0.0165069	0.704216	1	0.0179655	0.782202	1.05433	0.0147449	7.33562	7.40907	2.78593	3.53433	3.80093	3.72766	1.36104	1.53403	0.0107877
	F_Ala_Prot_L	0.429118	0.426798	0.608312	0.956379	0.921138	1.2091	4.34837	4.16823	3.81543	0.590458	0.479617	0.411004	1.44012	1	0.831379	4.25845	4.05219	3.6401	1.74789	1.75178	1.15199	3.00079	3.00261	2.24134	5.47172	5.45239	3.49867
Protein synth	F_Gltm_Prot_L	0.331538	0.348623	0.523817	0.731619	0.738846	1.03467	3.22012	3.1787	3.16865	0.567929	0.554109	0.40848	1.16131	1	0.797318	3.22156	3.1746	3.07153	1.34477	1.34598	0.791116	2.22151	2.22135	1.57171	3.81672	3.79531	2.96883
	F_Asprt_Prot_L	0.0357382	0.0927027	0.698753	0.136238	0.197356	1.28289	2.78299	2.99965	3.91157	0.806188	0.840938	0.245345	1.35223	1	0.470698	3.02206	3.37115	3.81287	1.57362	1.58092	2.06749	3.28544	3.2912	3.32191	7.66609	7.76739	3.96407
	F_OAA_Asprt_L	0.249879	0.298142	0.468753	0.44485	0.516467	0.689424	0.951035	1.13259	0.985002	0.668427	0.838419	0.340811	0.755887	1	0.503863	1.1023	1.29601	0.948605	0.0388543	0.0411243	0.293939	0.193239	0.195346	0.360621	0.751802	0.785466	0.879903
	F_AKG_Gmt_L	0.0828536	0.151785	0.370954	0.156871	0.267564	0.775369	0.726562	1.11271	2.36905	0.535417	0.765685	0.218843	0.630638	1	0.392362	1.10271	1.58297	2.40126	0.0422029	0.0516213	0.139828	0.158973	0.164843	0.150071	0.627962	0.688873	1.84517
	F_Ala_Pyr_L	0.3803	0.492449	0.668654	0.568537	0.739226	1.07016	0.726162	0.953483	1.8719	0.571514	0.682003	0.802678	0.740844	1	1.26575	0.90478	1.13717	2.01154	0.00480574	0.00587275	0.0679649	0.0357235	0.0377131	0.0736885	0.359201	0.399394	2.04085
	F_Asprt_OAA_L	0.0328319	0.108014	0.727164	0.0952347	0.181002	1.1653	0.613057	0.877966	2.26581	0.717002	1.05218	0.451427	0.738359	1	0.742841	0.824662	1.16892	2.46335	0.00435891	0.00534051	0.114916	0.0423752	0.0447847	0.113225	0.572466	0.644167	2.6568
Protein Breakdown	F_Gmt_AKG_L	0.674113	0.777709	1.00926	1.00825	1.15618	1.69115	1.13404	1.31326	3.24819	0.555878	0.654495	1.08089	0.717047	1	1.74011	1.23243	1.45024	3.46164	0.00320276	0.00337994	0.0260637	0.0204851	0.0207552	0.0438231	0.369362	0.394172	3.43748
	F_Prot_Gltm_L	1.31196	1.30839	1.31857	1.38885	1.3747	1.4291	1.51569	1.46137	1.77168	0.967191	0.949789	1.27867	0.988772	1	1.36171	1.43098	1.36068	1.80017	0.139453	0.138445	0.507	0.367955	0.366875	0.587145	1.13179	1.14988	1.84541
	F_Prot_Asprt_L	1.41614	1.41081	1.39164	1.46524	1.44891	1.47265	1.39961	1.35053	1.69491	0.984107	0.966416	1.36552	0.980023	1	1.42718	1.31995	1.25972	1.72916	0.131266	0.130431	0.490347	0.338294	0.337496	0.553736	1.00717	1.0239	1.76741
	F_Prot_Ala_L	1.31196	1.30839	1.31857	1.38885	1.3747	1.4291	1.51569	1.46137	1.77168	0.967191	0.949789	1.27867	0.988772	1	1.36171	1.43098	1.36068	1.80017	0.139453	0.138445	0.507	0.367955	0.366875	0.587145	1.13179	1.14988	1.84541
	F_Arg_Ornit_Urea_L	1.03128	0.705868	0.312383	1.62016	1.16687	0.469905	1.68077	1.52148	0.716637	0.633211	0.668905	0.453209	0.814666	1	0.671005	1.60158	1.46167	0.675474	0.000500457	0.000575259	0.00488744	0.00424691	0.0040442	0.00731563	0.111699	0.100572	0.552742
	F_Citrin_Asprt_Arg_L	1.06655	0.735831	0.331249	1.7038	1.22124	0.4973	1.79301	1.62106	0.759287	0.648196	0.671922	0.437448	0.843135	1	0.653496	1.70634	1.55529	0.714415	0.000537413	0.000617733	0.00524436	0.00455904	0.00434168	0.00785521	0.119666	0.107746	0.581308
Urea Cycle	F_Crbphos_Ornit_Citrin_L	1.03133	0.705865	0.312376	1.62014	1.16685	0.469908	1.68066	1.52141	0.716593	0.633186	0.668906	0.453215	0.814629	1	0.671033	1.60152	1.46161	0.675436	0.000500732	0.000575621	0.00488484	0.00424725	0.00404475	0.00731733	0.111699	0.100573	0.552774
	F_NH4_Crbphos_L	1.03133	0.705864	0.312376	1.62014	1.16685	0.469909	1.68064	1.5214	0.716585	0.633185	0.668905	0.453217	0.814626	1	0.671089	1.60151	1.4616	0.675427	0.000500747	0.000575641	0.00488453	0.00424729	0.00404482	0.00731755	0.111697	0.100574	0.553368
	F_NAG_Acoa_Gmt_L	0.368044	0.473908	0.857676	0.589943	0.752144	1.39462	1.01267	1.27713	1.87619	0.538164	0.761636	0.804871	0.573243	1	1.16387	1.23042	1.49488	1.73496	0.0333934	0.0371372	0.150452	0.11447	0.118927	0.189641	0.345457	0.372013	1.51997
	F_Acoa_Gmt_NAG_L	0.368038	0.473898	0.857652	0.589935	0.752132	1.39482	1.01267	1.27717	2.12806	0.538152	0.761632	0.804851	0.573231	1	1.24645	1.23044	1.495	2.19212	0.0333988	0.0371463	0.150446	0.114468	0.118925	0.189637	0.345436	0.37197	2.12238
Oxidative Phosporylation	F_O2_H2O_Ln	1.17232	1.17267	1.16985	1.17986	1.17905	1.17815	1.1741	1.16848	1.18243	0.980045	0.986423	1.03618	0.964912	1	1.08345	1.16184	1.15444	1.17766	0.0867523	0.0804275	0.260235	0.186059	0.175015	0.23592	0.331508	0.326729	1.16296
	F_O2_H2O_Lf	1.16412	1.1711	1.16906	1.17298	1.17961	1.1796	1.15	1.16038	1.19454	0.950241	0.976714	1.03396	0.880267	1	1.08369	1.14338	1.15023	1.19538	0.0260187	0.0254437	0.210792	0.106979	0.105827	0.182292	0.218232	0.224196	1.18288
	F_ATP_ADP_L	1.17519	1.1751	1.20876	1.11445	1.11391	1.17788	1.18682	1.19383	1.11774	1.00635	1.0123	0.957737	0.992305	1	0.952087	1.17483	1.18208	1.09299	0.0051133	0.00472241	0.0792976	0.0245911	0.0226919	0.0659319	0.123499	0.117725	0.991924
	F_ATP_GTP_L	0.924808	0.927123	-0.339384	2.29503	2.29626	0.757611	-1.83042	-2.23917	2.79482	1.66943	2.05046	3.37819	-0.830207	1	5.07005	-2.01037	-2.51216	3.66984	-0.427213	-0.422092	-2.12096	-1.51683	-1.48967	-2.18799	-2.91035	-2.97235	4.91215
ATP Synth_Brk	F_ATP_UTP_L	0.000106294	0.000125132	0.000176557	0.000263732	0.000297806	0.000203976	0.00777514	0.0111321	0.000170552	0.745925	0.88817	0.000668499	1.57552	1	0.000807714	0.100716	0.203851	0.000319233	0.358972	0.333709	3.84144	1.44838	1.35179	3.29754	2.62107	2.51812	0.00137338
	F_ATP_AMP_ADP_L	12.7929	11.9911	2.48637	4.18114	3.95129	4.43049	-196.124	-183.249	-23.1443	0.547508	2.35864	1.52573	0.201638	1	4.58523	-71.6344	-119.423	-22.4199	21.0007	21.6693	-589.947	86.9201	157.153	506.242	118.221	118.562	25.6946
	Glu_Rel_L	1.19768	1.20591	1.0821	1.22087	1.23871	1.02847	0.811547	0.847419	0.908547	0.976203	0.962811	1.22607	0.753909	1	1.21557	0.872125	0.914058	0.73617	-0.0342042	-0.0235944	-0.339973	-0.0877342	-0.078936	-0.268475	-0.0584416	-0.0553966	0.64679
	FFA_up_L	0.701832	0.726425	0.855873	0.685234	0.71248	0.858142	0.719495	0.818586	0.881758	0.763146	0.978776	0.856185	0.707906	1	0.88337	0.796705	0.966841	0.917191	0.00271081	0.00479285	0.208335	0.0214889	0.0304796	0.177155	0.00109095	0.0177444	0.927376
	AA_up_L	0.785926	0.806481	0.663728	1.5052	1.55517	1.37526	2.15203	2.15238	3.12966	0.455031	0.494054	0.883798	0.851357	1	1.69896	2.09236	2.08904	3.23595	0.385899	0.384628	0.135015	0.631138	0.630428	0.413472	1.29026	1.28114	3.2025
	Lac_up_L	4.26256	4.19084	3.94487	3.93201	3.78075	3.54187	1.75489	1.3044	2.77261	1.38869	1.06877	4.51597	1.19815	1	4.37683	1.11426	0.718067	2.91371	0.598019	0.597059	-0.565039	-0.16343	-0.102211	-0.401565	0.559062	0.539699	3.49678
	Pyr_up_L	1.55102	1.54702	1.52538	1.54007	1.53005	1.5151	1.44507	1.41411	1.49624	0.926132	1.02965	1.52646	0.459362	1	1.511	1.40443	1.36668	1.49993	-0.789949	-0.678679	0.571805	0.298314	0.333677	0.626375	0.599552	0.568715	1.49681
Transport Fluxes	Glr_up_L	0.933199	0.941065	1.04941	0.859311	0.851427	1.01629	0.617269	0.606697	0.942292	0.985929	0.995789	1.4103	0.969815	1	1.39284	0.689107	0.697359	1.03239	0.0833786	0.0812329	0.23151	0.123322	0.123012	0.241312	0.130263	0.132392	1.1895
	Co2_rel_L	1.22497	1.21853	1.21234	1.25197	1.24086	1.24306	1.24354	1.21386	1.28336	0.991538	0.976417	1.06834	0.991879	1	1.13266	1.21225	1.18256	1.27658	0.0635239	0.060619	0.299791	0.210302	0.198053	0.275881	0.393369	0.379577	1.27217
	O2_up_L	1.16961	1.17215	1.16959	1.17759	1.17923	1.17862	1.16614	1.1658	1.18643	0.970201	0.983216	1.03545	0.936955	1	1.08353	1.15575	1.15305	1.18351	0.0666921	0.0622664	0.243907	0.159938	0.152162	0.218204	0.294092	0.292862	1.16954
	F_Urea_Bld	1.13999	1.07057	0.562305	1.7478	1.69061	0.844828	1.63342	1.59198	1.28784	0.60753	0.667577	0.818714	0.779719	1	1.20923	1.54691	1.48141	1.22145	0.000471108	0.000541458	0.00463312	0.00400246	0.00380981	0.00688588	0.106853	0.0996009	1.00539
	F_NH4_Bld	0.848223	1.75122	6.02514	1.23725	2.17937	9.86724	2.54709	2.62326	17.6572	0.650513	0.211138	4.91306	1.51721	1	8.58452	2.16597	2.38637	19.7625	0.183336	0.155849	0.945971	0.77184	0.756501	1.77594	4.72836	4.84637	22.7251
	TG_rel_L	-0.145266	-0.105472	0.236253	-0.129524	-0.0856762	0.291125	0.134024	0.379746	0.38201	0.47	0.919915	0.459871	0.560661	1	0.491268	0.31303	0.772842	0.446828	0.00446644	0.00945303	0.313059	0.014795	0.0292767	0.269698	-0.0249757	-0.0119957	0.491169
	Gly_Brk_Synth_Diff	0.0793572	0.0791501	0.0820779	0.076794	0.0764445	0.0797763	0.554477	0.687666	0.075832	0.214598	0.0253335	0.356529	-0.540329	0	0.353959	1.47043	1.32266	0.132792	-0.278937	-0.259583	-3.64324	-1.32179	-1.23088	-3.10886	-2.44027	-2.34191	1.17095
	Glycolysis_Gluconeo_Diff	-1.34089	-1.34386	-1.15866	-1.46757	-1.44642	-1.27672	0.790696	1.02044	-1.45015	0.00157544	-0.0438165	-1.41247	0.245096	0	-1.61262	1.14669	1.47573	-1.55852	4.64773	3.55766	5.81943	6.46157	5.22316	4.84765	0.246813	0.163974	-1.65252
	Pyr_Acoa_Pyr_oAA_Diff	-0.495167	-0.717128	-0.79914	-0.426541	-0.670877	-0.837854	0.612073	0.163112	-0.877535	0.576439	-0.312007	-1.10442	2.29064	0	-1.19686	0.432982	0.117407	-1.0098	0.811617	0.768665	1.88688	2.43044	2.1963	2.24012	3.93143	3.55699	-1.18563
	FFA_Synth_Brk Diff	-1.1153	-1.12945	-1.13811	-1.07777	-1.09428	-1.10972	-0.99632	-1.03226	-1.08523	0.0636955	-0.431907	-1.01198	0.507579	0	-1.03463	-0.927969	-0.966334	-1.10611	0.00355621	0.00257679	0.0493738	0.021174	0.0196275	0.264289	0.368588	0.296979	-1.09716
Flux Directions	Citrate_AKG_Cit_Shtl Diff	1.18286	1.18794	1.19332	1.14637	1.15296	1.16334	1.07776	1.0922	1.10739	-0.0359679	0.454022	1.054	-0.4372	0	1.06738	0.994507	1.01645	1.10046	0.0342155	0.0335011	0.0194859	0.101272	0.0993878	-0.188035	-0.261692	-0.244302	1.07176
	Triglycride_Synth_Brk_Diff	-1.89758	-1.94433	-2.2512	-1.82489	-1.87567	-2.308	-0.873446	-0.747191	-2.35403	-0.305207	-0.0325153	-2.5188	-0.168884	0	-2.53269	-0.631862	-0.381804	-2.51925	-0.0416003	-0.0372672	-0.0338428	-0.108268	-0.0965029	-0.0271144	-0.321352	-0.323009	-2.62504
	G6p_Gly_G6p_F6p_Diff	0.0241236	0.0328577	0.0696683	0.059606	0.0687794	0.0766643	0.603998	0.720009	0.0904847	0.244853	0.104963	0.087282	-0.419595	0	0.0978641	1.17082	1.29921	0.0845132	8.57586	7.43856	4.3167	8.11107	7.24504	4.19392	-0.985778	-1.11814	0.142803
	AKG_Gmt_AKG_Diff	-0.59126	-0.625924	-0.638308	-0.851384	-0.888615	-0.915778	-0.407479	-0.200545	-0.879133	-0.0204607	0.111189	-0.862044	-0.0864091	0	-1.34775	-0.129725	0.132728	-1.06039	0.0390002	0.0482413	0.113765	0.138488	0.144087	0.106248	0.2586	0.294701	-1.59231
	Gmt_AKG_NH4_Carbphos	0.573297	0.886748	2.0434	0.525501	0.76155	1.94884	0.242454	0.131816	1.22684	0.032314	-0.166226	1.90206	0.106072	0	2.0083	0.0810017	-0.0908103	1.56995	-77.8839	-83.8045	-23.2908	-32.6062	-35.6227	-14.5196	-2.31519	-2.93019	2.8775
